# Supplementary material for: Bottom-electrode induced defects in self-assembled monolayer (SAM)-based tunnel junctions affect only the SAM resistance, not the contact resistance or SAM capacitance
Source: Royal Society of Chemistry journal article supplement (doi:10.1039/c8ra01513a), 2018-01-01
Supplement: c8ra01513a1.pdf [file c8ra01513a1.pdf]

**Supporting Information**

**Bottom-Electrode Induced Defects in Self-Assembled Monolayer (SAM)-Based Tunnel Junctions affect only the SAM Resistance, not the Contact Resistance or SAM Capacitance**

*C. S. Suchand Sangeeth<sup>1</sup>, Li Jiang<sup>1</sup>, and Christian A. Nijhuis<sup>1,2,3\*</sup>*

<sup>1</sup> Department of Chemistry, National University of Singapore, 3 Science Drive 3, Singapore 117543.

<sup>2</sup> Centre for Advanced 2D Materials and Graphene Research Centre, National University of Singapore, 6 Science Drive 2, Singapore 117546

<sup>3</sup> NUSNNI-Nanocore, National University of Singapore, Singapore 117411, Singapore

**Modeling Impedance spectra:** Impedance  $Z$  is a more general concept than resistance and can be expressed as<sup>1,2</sup>

$$Z = Z' + jZ'' \quad (1)$$

where  $Z'$  and  $Z''$  are the real and imaginary part respectively. One can express  $Z$  in polar form as

$$Z = |Z|e^{j\phi} \quad (2)$$

where  $|Z|$  is the modulus of the complex impedance and  $\phi$  represents the phase difference which appears between the applied voltage and measured current.

Consider a simple network comprising of resistance  $R$  and capacitance  $C$  connected in parallel. In this case the complex impedance  $Z$  is given by

$$\frac{1}{Z} = \left( \frac{1}{R} + j\omega C \right) \quad (3)$$

The expression 3 can be separated into real and imaginary parts as,

$$Z = \left( \frac{R}{1 + j\omega RC} \right) = \left( \frac{R}{1 + \omega^2 R^2 C^2} \right) - j \left( \frac{\omega CR^2}{1 + \omega^2 R^2 C^2} \right) \quad (4)$$

Here  $\omega$  is the angular frequency in rad/sec. Now connecting a series resistance  $R_C$ , the above expression (4) gets modified to<sup>1,2</sup>

$$Z = \left( R_C + \frac{R}{1 + \omega^2 R^2 C^2} \right) - j \left( \frac{\omega CR^2}{1 + \omega^2 R^2 C^2} \right) \quad (5)$$

The above scenario is shown in figure 1c in main text.

**Tunneling decay coefficient:** Figure S1 shows the dependence of tunneling current at 0.5 V for molecular junctions on different bottom surfaces as a function of molecular chain length. For our experiments, we only used junction that had their  $J(V)$  characteristics within one log-standard deviation from the log-mean  $J(V)$  curve which are reported in reference 3. All impedance measurements were repeated 3 times using 3 different junctions following previously reported procedures reported elsewhere.<sup>4,5</sup>. We fitted the curves using eq 1 in main text and the value of  $\beta$  is obtained. We note that in all impedance measurements the geometrical junction area was  $9.6 \times 10^2 \mu\text{m}^2$ .

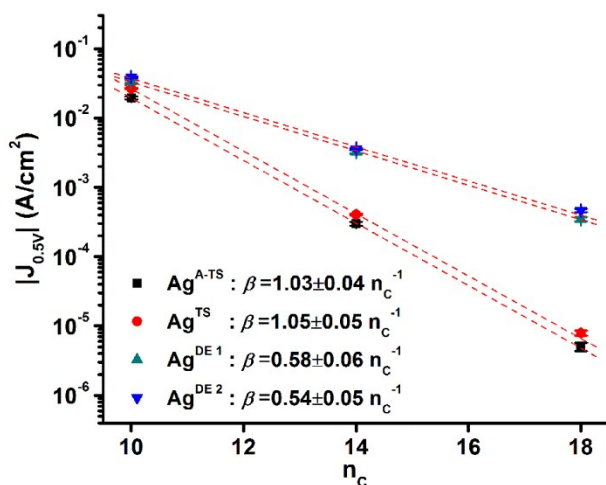

**Figure S1:** The length dependence of  $|J|$  at 0.50 V for SAM-based tunneling junctions formed on different bottom surfaces.

**Capacitance vs 1/d:** Figure S2 shows the capacitance plot as a function of  $1/d$ . The capacitance follows the linear dependence with  $1/d$  and fitting to eq 6 of main text. We estimated the dielectric constant of the SAMs using eq 6.

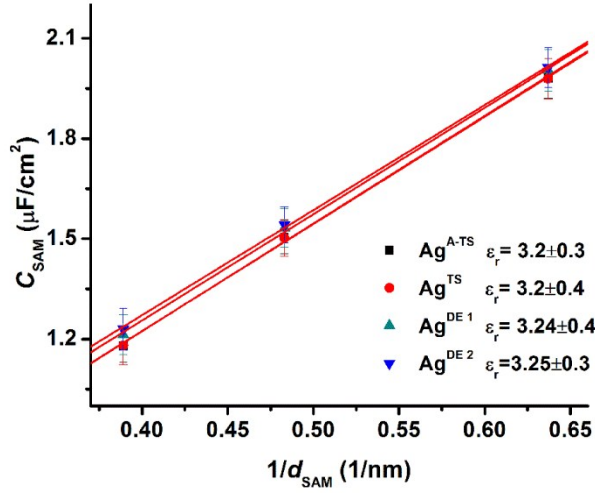

**Figure S2:**  $C_{\text{SAM}}$  vs.  $1/d$  plots for SAM-based tunneling junctions formed on different bottom surfaces.

**Bearing Volume calculation:** To capture more detailed information of the surface topography, we use previously reported method, bearing volume (BV)<sup>3</sup>, to determine the quality of the electrode surfaces. The value of rms is determined by AFM images of  $5 \times 5 \mu\text{m}^2$  as shown in Figure 2. We used a so-called “split and count” method<sup>3</sup> to estimate the grain size ( $A_{\text{gr}}$ ). Briefly, we divided the AFM images into small boxes and counted the number of small boxes occupied by each grain. The relative number of grains ( $N_{\text{gr}}$ ) is then determined by normalization of  $A_{\text{gr}}$  to the largest grain size. We determined the width of the grain boundaries ( $d_{\text{gb}}$ ) using the line-scans. We calculated the average radius of the grains ( $R_{\text{gr}}$ ) by  $R_{\text{gr}} = (A_{\text{gr}}/\pi)^{0.5}$ . Then, the area of the grain boundary ( $A_{\text{gb}}$ ) is then estimated by  $A_{\text{gb}} = \pi(R_{\text{gr}} + d_{\text{gb}})^2 - \pi R_{\text{gr}}^2$ . Finally, the BV is calculated using  $\text{BV} = N_{\text{gr}} \times A_{\text{gb}} \times \text{rms}$ .

**Nyquist plots:** The Nyquist plots of SAM based molecular junctions are shown in figure S3. The semi-circular plots suggest the presence of parallel RC elements in the equivalent circuit.

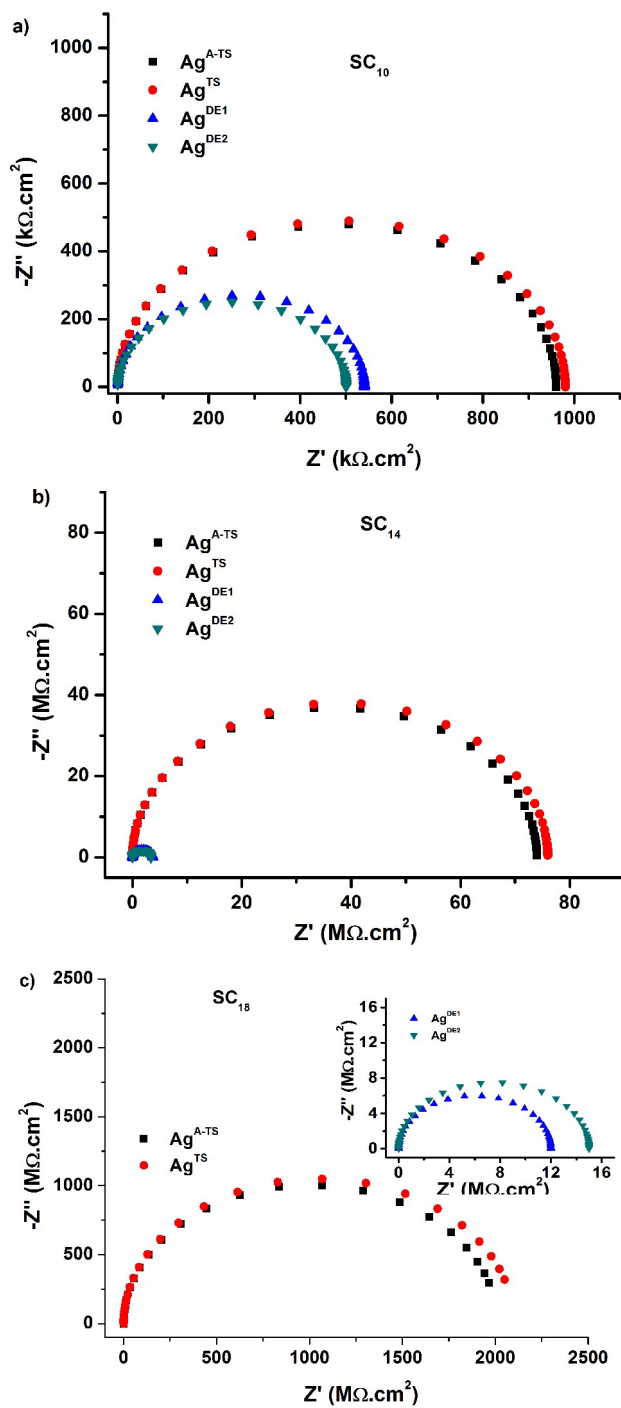

**Figure S3:** Nyquist plots for SAM-based tunneling junctions formed on different bottom surfaces.

**Equivalent circuit parameters as a function of BV:** The equivalent circuit parameters ( $R_{\text{SAM}}$ ,  $R_{\text{C}}$  and  $C_{\text{SAM}}$ ) are presented in figure S4 and S5 as a function of BV. The capacitance and contact resistance shows no significant change with BV while  $R_{\text{SAM}}$  shows orders of magnitude change with BV for long chain molecules ( $\text{SC}_{14}$  and  $\text{SC}_{18}$ ).

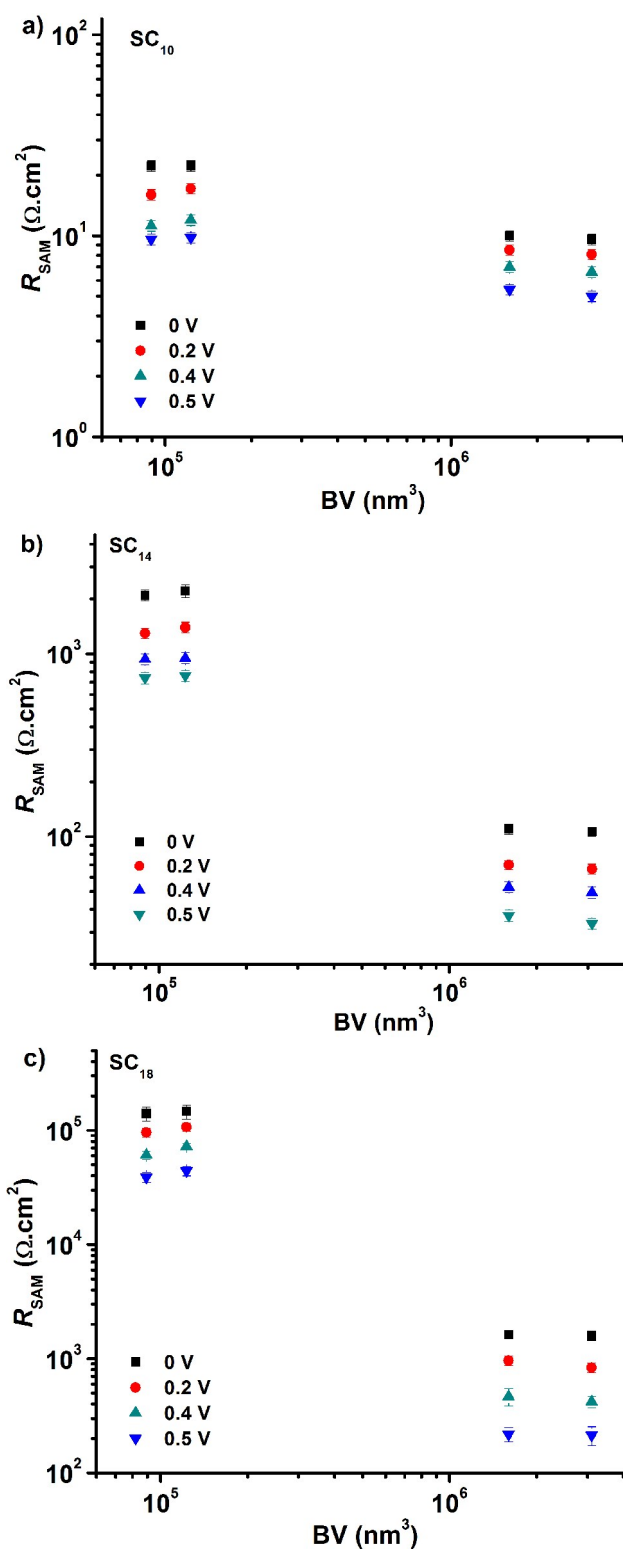

**Figure S4:** Plots of  $R_{\text{SAM}}$  as a function of  $BV$  for junctions with  $\text{SC}_{10}$ ,  $\text{SC}_{14}$  and  $\text{SC}_{18}$  SAMs.

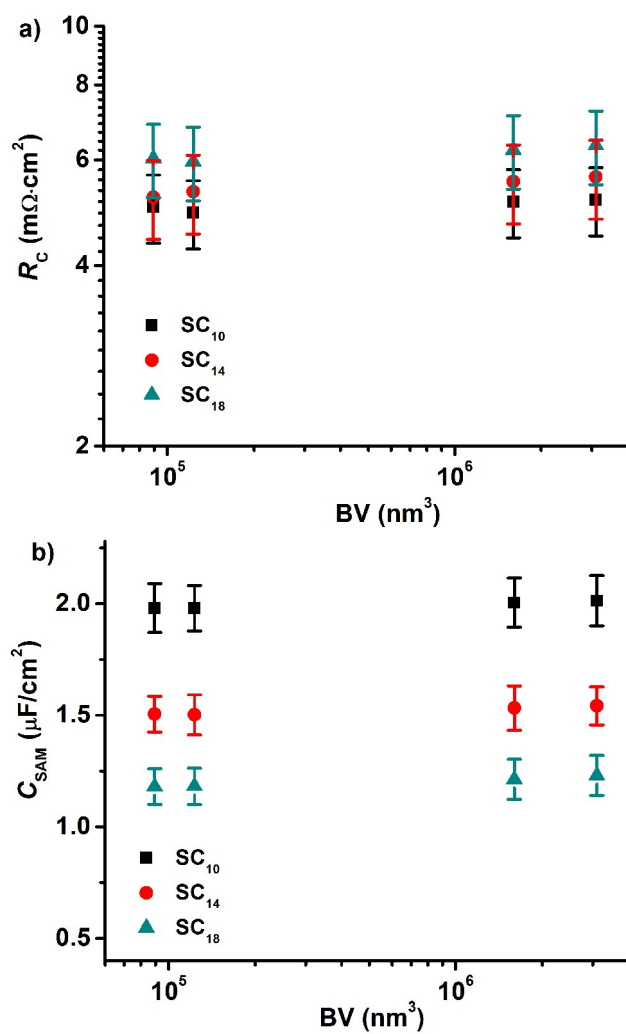

**Figure S5:** Plots of  $R_C$  and  $C_{SAM}$  as a function of BV for junctions with SC<sub>10</sub>, SC<sub>14</sub> and SC<sub>18</sub> SAMs.



Table S1. Summary of surface topography of different bottom-electrodes.

| Surfaces                  | rms (nm) | $N_{\text{gr}}$ | $A_{\text{gb}}(\text{nm}^2)$ | BV ( $\text{nm}^3$ ) |
|---------------------------|----------|-----------------|------------------------------|----------------------|
| $\text{Ag}^{\text{A-TS}}$ | 0.5      | 1.0             | $1.6 \times 10^5$            | $8 \times 10^4$      |
| $\text{Ag}^{\text{TS}}$   | 0.7      | 1.2             | $1.6 \times 10^5$            | $1 \times 10^5$      |
| $\text{Ag}^{\text{DE},1}$ | 2.1      | 48              | $2.4 \times 10^4$            | $2 \times 10^6$      |
| $\text{Ag}^{\text{DE},2}$ | 4.8      | 4.6             | $1.2 \times 10^5$            | $3 \times 10^6$      |

Note: The values of  $N_{\text{gr}}$  and  $A_{\text{gb}}$  are taken from reference 3.

## References

1. J. R. Macdonald and W. B. Johnson, In *Impedance Spectroscopy*; John Wiley & Sons, Inc.: 2005, p 1.
2. C. S. S. Sangeeth, A. Wan and C. A. Nijhuis, *J. Am. Chem. Soc.*, 2014, **136**, 11134.
3. L. Yuan, L. Jiang, B. Zhang and C. A. Nijhuis, *Angew. Chem., Int. Ed.*, 2014, 53, 3377-3381.
4. C. S. S. Sangeeth, A. Wan and C. A. Nijhuis, *Nanoscale*, 2015, **7**, 12061-12067.
5. L. Jiang, C. S. Sangeeth and C. A. Nijhuis, *J Am Chem Soc*, 2015, **137**, 10659-10667.
